# Supplementary material for: Steam reforming of aromatics mixture as a model tar over Ni/Al2O3 structured catalyst
Source: Royal Society of Chemistry journal article supplement (doi:10.1039/d4nj00856a), 2024-01-01

## **Steam reforming of aromatics mixture as a model tar over Ni/Al<sub>2</sub>O<sub>3</sub> structured catalyst**

Ryo Watanabe<sup>a</sup>, Takuya Tanabe<sup>a</sup>, Yuya Fushimi<sup>a</sup>, Priyanka Verma<sup>b</sup> and Choji Fukuhara<sup>a, \*</sup>

*a) Department of Applied Chemistry and Biochemical Engineering, Graduate School of Engineering, Shizuoka University,  
3-5-1 Johoku, Chuo-ku, Hamamatsu, Shizuoka 432-8561, Japan*

*b) Department of Chemistry, Indian Institute of Technology Delhi, Hauz Khas, New Delhi, 110016, India*

(\* ) corresponding author: fukuhara.choji@shizuoka.ac.jp

Fig. S1. Carbon balance during durability test for SR-TN over the structured catalyst.

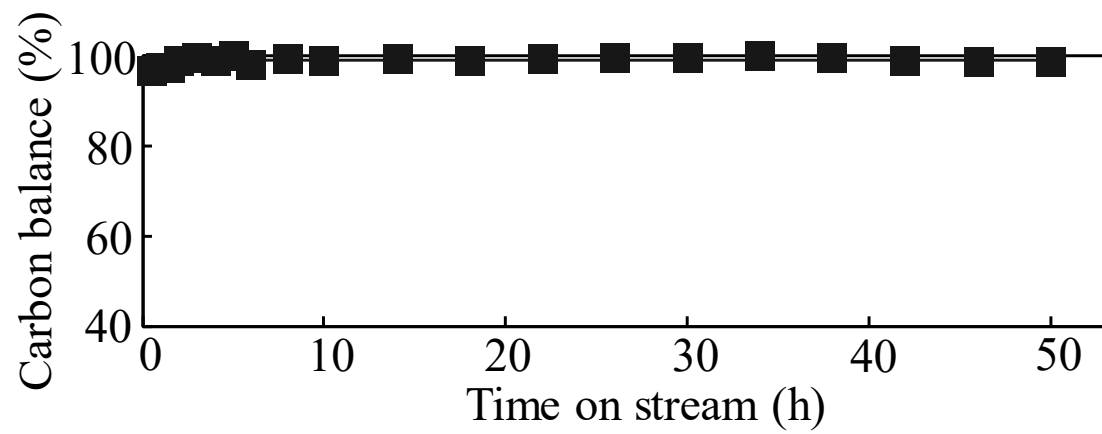

| T/N ratio | Flow rate (mmol·min <sup>-1</sup> ) |             |                  |                |
|-----------|-------------------------------------|-------------|------------------|----------------|
|           | Toluene                             | Naphthalene | H <sub>2</sub> O | N <sub>2</sub> |
| 9/1       | 0.43                                | 0.048       | 5.3              | 4.0            |
| 8/2       | 0.38                                | 0.096       | 5.5              | 3.8            |
| 7/3       | 0.34                                | 0.14        | 5.7              | 3.6            |
| 6/4       | 0.29                                | 0.19        | 5.9              | 3.4            |

Table S1. Reaction condition of mixture ratio in SR-TN.

Fig. S2. Comparison of durability performance of the structured catalyst to that of the granular catalyst for SR-TN.

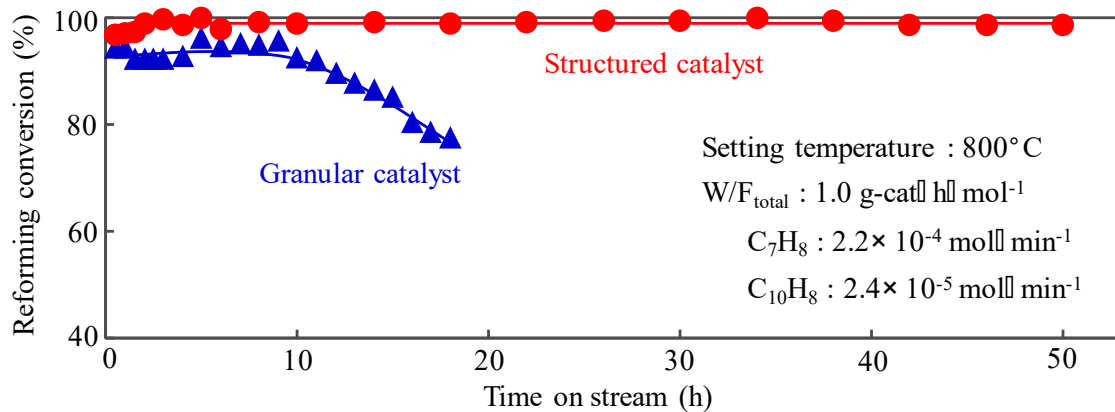

Supplement: d4nj00856a1.pdf [file d4nj00856a1.pdf]
